# Supplementary material for: Tasting the differences: microbiota analysis of different insect-based novel food
Source: bioRxiv or medRxiv preprint supplement (doi:10.1101/2020.02.20.957845), 2020-02-20
Supplement: Supplementary file [file media-1.pdf]

# Tasting the differences: microbiota analysis of different insect-based novel food

## *Short title: Microbiota signature in insect-based food*

Jessica Frigerio<sup>1¶</sup>, Giulia Agostinetto<sup>2¶</sup>, Andrea Galimberti<sup>2</sup>, Fabrizio De Mattia<sup>1</sup>, Massimo Labra<sup>2</sup>, Antonia Bruno<sup>2\*</sup>

<sup>1</sup>FEM2-Ambiente, Piazza della Scienza 2, I-20126 Milano, Italy;

<sup>2</sup>Zooplantlab, Department of Biotechnology and Biosciences, University of Milano-Bicocca, Piazza della Scienza 2, I-20126 Milano, Italy;

\* Corresponding author

email: antonia.bruno@unimib.it

¶These authors contributed equally to this work

**S1 Table. Insects used in the processed food analysed in this study.**

|                        |                                                                                                                                                                                         |                                                                                                                                                                                                                                                          |                                                                                                                                                                                                                                                                                                                                                                                                                                                              |
|------------------------|-----------------------------------------------------------------------------------------------------------------------------------------------------------------------------------------|----------------------------------------------------------------------------------------------------------------------------------------------------------------------------------------------------------------------------------------------------------|--------------------------------------------------------------------------------------------------------------------------------------------------------------------------------------------------------------------------------------------------------------------------------------------------------------------------------------------------------------------------------------------------------------------------------------------------------------|
| <b>Scientific name</b> | <i>Acheta domesticus</i><br>(Linnaeus, 1758)                                                                                                                                            | <i>Tenebrio molitor</i><br>(Linnaeus, 1758)                                                                                                                                                                                                              | <i>Alphitobius diaperinus</i><br>(Panzer, 1797)                                                                                                                                                                                                                                                                                                                                                                                                              |
| <b>Taxonomy</b>        | Order: Orthoptera<br>Family: Gryllidae                                                                                                                                                  | Order: Coleoptera<br>Family: Tenebrionidae.                                                                                                                                                                                                              | Order: Coleoptera<br>Family: Tenebrionidae                                                                                                                                                                                                                                                                                                                                                                                                                   |
| <b>Description</b>     | House cricket, native to Southwest Asia, widespread in tropical and temperate zones. Species is native to most of the European countries.                                               | Known as mealworm. It has a cosmopolitan distribution, being common in Europe, as a pest of grain storages.                                                                                                                                              | Known as lesser mealworm or litter beetle. It has a cosmopolitan distribution, being common in Europe, as a pest of grain storages and poultry farms.                                                                                                                                                                                                                                                                                                        |
| <b>Growth</b>          | Adults grow up to 20-22 mm, both sexes are fully winged. Adult females are slightly bigger with prominent ovipositor protruding from the abdomen. Crickets are greyish yellow in color. | The adult beetles are up to 15-18 mm long. It is shiny black or brown with reddish brown elytra.<br>The eggs are oval, whitish, about 1.5 mm long.<br>The larvae resemble larvae of other mealworms, at the final stage measuring up to 25 mm in length. | The adult beetles are 6 mm long, oval. It is shiny black or brown with reddish brown elytra. Color is variable among individuals and subpopulations and changing with age. The antennae are paler at the tips and are covered in tiny, yellowish hairs. The elytra have shallow longitudinal grooves. The eggs are narrow, whitish, about 1.5 mm long.<br>The larvae resemble larvae of other mealworms, at the final stage measuring up to 11 mm in length. |

|                                                              |                                                                                                                                                                                                         |                                                                                                                                                   |                                                                                                                                                 |
|--------------------------------------------------------------|---------------------------------------------------------------------------------------------------------------------------------------------------------------------------------------------------------|---------------------------------------------------------------------------------------------------------------------------------------------------|-------------------------------------------------------------------------------------------------------------------------------------------------|
| <b>Incubation period (days from egg-laying to hatch)</b>     | 11                                                                                                                                                                                                      | 10-12                                                                                                                                             | 10-12                                                                                                                                           |
| <b>Time to maturity (days from hatch to max body weight)</b> | 32-49                                                                                                                                                                                                   | 280-400                                                                                                                                           | 280-400                                                                                                                                         |
| <b>Resistance</b>                                            | Species is resistant to environmental conditions, and is very productive in mass culture, tolerating high population densities. The species is however very susceptible to the Cricket Paralysis Virus. | Species is resistant to environmental conditions, and is very productive in mass culture, tolerating high population densities.                   | Species is resistant to environmental conditions and is very productive in mass culture.                                                        |
| <b>Protein and fat content</b>                               | Protein content in larvae and imagines varies from 60 to 70% (d.m.), with a fat content of 20-25 % (d.m.)                                                                                               | Protein content in larvae varies from 50 to 65% (d.m.), with a fat content of 30-40 % (d.m.) highly depending on the feed and rearing conditions. | Protein content in larvae varies from 50 to 65% (d.m.), with fat content of 30-40 % (d.m.) highly depending on the feed and rearing conditions. |

Adapted from [http://ipiff.org/wp-content/uploads/2019/03/IPIFF\\_Guide\\_A4\\_2019-v5-separate.pdf](http://ipiff.org/wp-content/uploads/2019/03/IPIFF_Guide_A4_2019-v5-separate.pdf)

**S2 Table. List of primer pairs used for DNA barcoding and metabarcoding analyses.**

| Primer name | 5'-3'                      | Barcode locus | Reference |
|-------------|----------------------------|---------------|-----------|
| LCO1490     | GGTCAACAAATCATAAAGATATTGG  | COI           | [17]      |
| HC02198     | TAAACTTCAGGGTGACCAAAAAATCA |               |           |
| 340F        | CTACGGGNGGCWGCAG           | 16S           | [19]      |
| 806R        | GACTACHVGGGTATCTAATCC      |               |           |

**S3 Table. Results of alpha microbial diversity.**

Pairwise comparison of ASVs counts between samples among to the same insect (*A. domesticus* n=12; *A. diaperinus* n=9; *T. molitor* n=15)

| Group 1 | Group 2 | H | P-value | Q-value |
|---------|---------|---|---------|---------|
|---------|---------|---|---------|---------|

|                      |                      |       |        |        |
|----------------------|----------------------|-------|--------|--------|
| <i>A. domesticus</i> | <i>A. diaperinus</i> | 14.78 | < 0.01 | < 0.01 |
| <i>A. domesticus</i> | <i>T. molitor</i>    | 5.83  | 0.015  | 0.015  |
| <i>A. diaperinus</i> | <i>T. molitor</i>    | 14.82 | < 0.01 | < 0.01 |

Pairwise comparison of Shannon index between samples among to the same insect (*A. domesticus* n=12; *A. diaperinus* n=9; *T. molitor* n=15)

| Group 1              | Group 2              | H     | P-value | Q-value |
|----------------------|----------------------|-------|---------|---------|
| <i>A. domesticus</i> | <i>A. diaperinus</i> | 14.72 | < 0.01  | < 0.01  |
| <i>A. domesticus</i> | <i>T. molitor</i>    | 19.28 | < 0.01  | < 0.01  |
| <i>A. diaperinus</i> | <i>T. molitor</i>    | 16.20 | < 0.01  | < 0.01  |

#### S4 Table. Results of beta microbial diversity.

PCoA Emperor plots based on the Bray-Curtis metric. Food samples were compared based on insect order (red: Coleoptera; blue: Orthoptera) and insect species (sphere: *A. domesticus*; triangle: *T. molitor*; square: *A. diaperinus*).

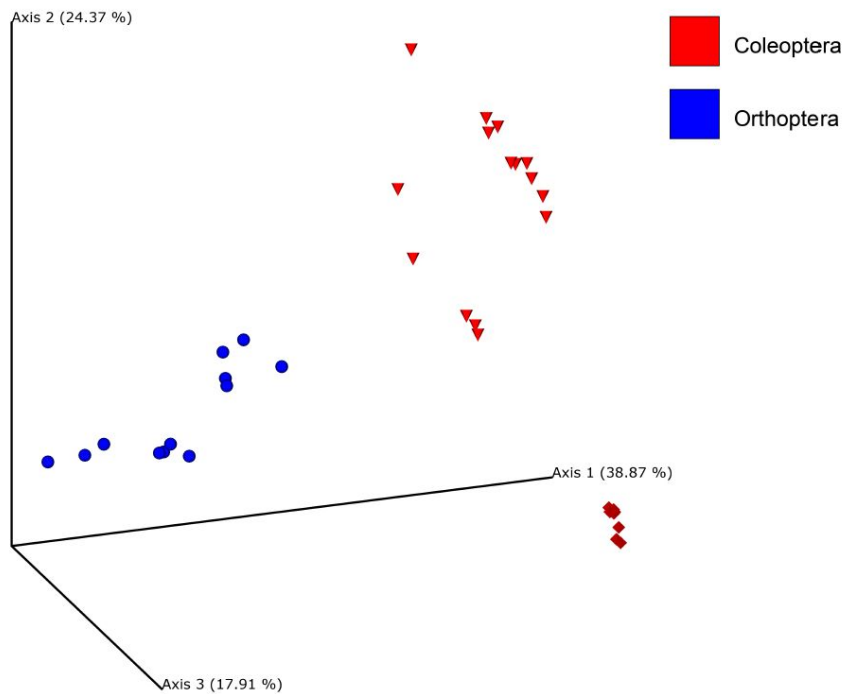

| <b>Raw materials (flour, n=12) vs food products (crackers, pasta, protein bars; n=24)</b> | <b>Pseudo-F</b> | <b>P-value</b> |
|-------------------------------------------------------------------------------------------|-----------------|----------------|
| Jaccard                                                                                   | 5.80            | 0.001          |
| Unweighted UniFrac                                                                        | 5.40            | 0.001          |
| Bray-Curtis                                                                               | 6.38            | 0.001          |
| Weighted UniFrac                                                                          | 8.21            | 0.002          |

| <b>Differences among samples belong to different insects (<i>A. domesticus</i> n=12; <i>A. diaperinus</i> n=9; <i>T. molitor</i> n=15)</b> | <b>Pseudo-F</b> | <b>P-value</b> |
|--------------------------------------------------------------------------------------------------------------------------------------------|-----------------|----------------|
| Jaccard                                                                                                                                    | 10.39           | 0.001          |
| Unweighted UniFrac                                                                                                                         | 11.37           | 0.001          |
| Bray-Curtis                                                                                                                                | 16.87           | 0.001          |
| Weighted UniFrac                                                                                                                           | 25.63           | 0.001          |

**Pairwise comparisons to test differences among samples belong to different insects (*A. domesticus* n=12; *A. diaperinus* n=9; *T. molitor* n=15).**

| <b>Insects</b>     | <b>Group 1</b>       | <b>Group 2</b>       | <b>Pseudo-F</b> | <b>P-value</b> | <b>Q-value</b> |
|--------------------|----------------------|----------------------|-----------------|----------------|----------------|
| Jaccard            | <i>A. domesticus</i> | <i>A. diaperinus</i> | 11.81           | 0.001          | 0.001          |
|                    | <i>A. domesticus</i> | <i>T. molitor</i>    | 8.30            | 0.001          | 0.001          |
|                    | <i>A. diaperinus</i> | <i>T. molitor</i>    | 12.35           | 0.001          | 0.001          |
| Unweighted UniFrac | <i>A. domesticus</i> | <i>A. diaperinus</i> | 14.51           | 0.001          | 0.001          |
|                    | <i>A. domesticus</i> | <i>T. molitor</i>    | 12.27           | 0.001          | 0.001          |
|                    | <i>A. diaperinus</i> | <i>T. molitor</i>    | 7.43            | 0.001          | 0.001          |
| Bray-Curtis        | <i>A. domesticus</i> | <i>A. diaperinus</i> | 16.20           | 0.001          | 0.001          |
|                    | <i>A. domesticus</i> | <i>T. molitor</i>    | 12.51           | 0.001          | 0.001          |
|                    | <i>A. diaperinus</i> | <i>T. molitor</i>    | 25.95           | 0.001          | 0.001          |
| Weighted UniFrac   | <i>A. domesticus</i> | <i>A. diaperinus</i> | 29.20           | 0.001          | 0.001          |
|                    | <i>A. domesticus</i> | <i>T. molitor</i>    | 25.16           | 0.001          | 0.001          |

|  |                      |                   |       |       |       |
|--|----------------------|-------------------|-------|-------|-------|
|  | <i>A. diaperinus</i> | <i>T. molitor</i> | 21.19 | 0.001 | 0.001 |
|--|----------------------|-------------------|-------|-------|-------|



# Supplementary S6

## *T. molitor*

| 100%ofsamples                                                                                                                               |        |        |     |       |       |          |          |
|---------------------------------------------------------------------------------------------------------------------------------------------|--------|--------|-----|-------|-------|----------|----------|
| Feature ID                                                                                                                                  | 2%     | 9%     | 25% | 50%   | 75%   | 91%      | 98%      |
| D_0_Bacteria;D_1_Tenericutes;D_2_Mollicutes;D_3_Entomoplasmatales;D_4_Spiroplasmataceae;D_5_Spiroplasma;D_6_uncultured Spiroplasma sp.      | 108.2  | 273.4  | 651 | 23608 | 38182 | 38720.24 | 38955.72 |
| D_0_Bacteria;D_1_Proteobacteria;D_2_Gammaproteobacteria;D_3_Enterobacteriales;D_4_Enterobacteriaceae; ;_                                    | 373.44 | 420.48 | 528 | 13517 | 21499 | 22918.52 | 23539.56 |
| D_0_Bacteria;D_1_Firmicutes;D_2_Bacilli;D_3_Lactobacillales;D_4_Enterococcaceae;D_5_Enterococcus;_                                          | 29.44  | 97.48  | 253 | 1607  | 2968  | 3427.52  | 3628.56  |
| D_0_Bacteria;D_1_Firmicutes;D_2_Bacilli;D_3_Bacillales;D_4_Staphylococcaceae;D_5_Staphylococcus;_                                           | 42.44  | 117.48 | 289 | 1209  | 1811  | 2555.96  | 2881.88  |
| D_0_Bacteria;D_1_Proteobacteria;D_2_Gammaproteobacteria;D_3_Enterobacteriales;D_4_Enterobacteriaceae;D_5_Enterobacter;_                     | 9.92   | 30.64  | 78  | 565   | 621   | 626.76   | 629.28   |
| D_0_Bacteria;D_1_Firmicutes;D_2_Bacilli;D_3_Lactobacillales;D_4_Streptococcaceae;D_5_Lactococcus;D_6_uncultured bacterium                   | 2.24   | 3.08   | 5   | 443   | 465   | 565.48   | 609.44   |
| D_0_Bacteria;D_1_Proteobacteria;D_2_Gammaproteobacteria;D_3_Pseudomonadales;D_4_Pseudomonadaceae;D_5_Pseudomonas;_                          | 73.28  | 112.76 | 203 | 330   | 339   | 395.32   | 419.96   |
| D_0_Bacteria;D_1_Firmicutes;D_2_Bacilli;D_3_Bacillales;D_4_Bacillaceae;D_5_Bacillus;_                                                       | 72.32  | 80.44  | 99  | 177   | 181   | 638.6    | 838.8    |
| D_0_Bacteria;D_1_Proteobacteria;D_2_Gammaproteobacteria;D_3_Enterobacteriales;D_4_Enterobacteriaceae;D_5_Serratia;_                         | 5.24   | 20.08  | 54  | 71    | 183   | 327      | 390      |
| D_0_Bacteria;D_1_Proteobacteria;D_2_Gammaproteobacteria;D_3_Enterobacteriales;D_4_Enterobacteriaceae;D_5_Pantoea;_                          | 11.08  | 11.36  | 12  | 43    | 70    | 89.2     | 97.6     |
| 70%ofsamples                                                                                                                                |        |        |     |       |       |          |          |
| Feature ID                                                                                                                                  | 2%     | 9%     | 25% | 50%   | 75%   | 91%      | 98%      |
| D_0_Bacteria;D_1_Tenericutes;D_2_Mollicutes;D_3_Entomoplasmatales;D_4_Spiroplasmataceae;D_5_Spiroplasma;D_6_uncultured Spiroplasma sp.      | 108.2  | 273.4  | 651 | 23608 | 38182 | 38720.24 | 38955.72 |
| D_0_Bacteria;D_1_Proteobacteria;D_2_Gammaproteobacteria;D_3_Enterobacteriales;D_4_Enterobacteriaceae; ;_                                    | 373.44 | 420.48 | 528 | 13517 | 21499 | 22918.52 | 23539.56 |
| D_0_Bacteria;D_1_Firmicutes;D_2_Bacilli;D_3_Lactobacillales;D_4_Streptococcaceae;D_5_Lactococcus;_                                          | 0.4    | 1.8    | 5   | 1846  | 1974  | 2781.04  | 3134.12  |
| D_0_Bacteria;D_1_Firmicutes;D_2_Bacilli;D_3_Lactobacillales;D_4_Enterococcaceae;D_5_Enterococcus;_                                          | 29.44  | 97.48  | 253 | 1607  | 2968  | 3427.52  | 3628.56  |
| D_0_Bacteria;D_1_Firmicutes;D_2_Bacilli;D_3_Lactobacillales;D_4_Lactobacillaceae;D_5_Lactobacillus;D_6_uncultured bacterium                 | 6.96   | 31.32  | 87  | 1268  | 1938  | 2294.48  | 2450.44  |
| D_0_Bacteria;D_1_Firmicutes;D_2_Bacilli;D_3_Bacillales;D_4_Staphylococcaceae;D_5_Staphylococcus;_                                           | 42.44  | 117.48 | 289 | 1209  | 1811  | 2555.96  | 2881.88  |
| D_0_Bacteria;D_1_Firmicutes;D_2_Bacilli;D_3_Lactobacillales;D_4_Leuconostocaceae;D_5_Weissella;D_6_Weissella confusa                        | 0.24   | 1.08   | 3   | 661   | 1114  | 1327.12  | 1420.36  |
| D_0_Bacteria;D_1_Firmicutes;D_2_Bacilli;D_3_Lactobacillales;D_4_Lactobacillaceae;D_5_Lactobacillus;_                                        | 0.56   | 2.52   | 7   | 626   | 766   | 1038     | 1157     |
| D_0_Bacteria;D_1_Proteobacteria;D_2_Gammaproteobacteria;D_3_Enterobacteriales;D_4_Enterobacteriaceae;D_5_Enterobacter;_                     | 9.92   | 30.64  | 78  | 565   | 621   | 626.76   | 629.28   |
| D_0_Bacteria;D_1_Firmicutes;D_2_Bacilli;D_3_Bacillales;D_4_Staphylococcaceae;D_5_Staphylococcus;D_6_uncultured bacterium                    | 12     | 54     | 150 | 464   | 751   | 1063.32  | 1199.96  |
| D_0_Bacteria;D_1_Firmicutes;D_2_Bacilli;D_3_Lactobacillales;D_4_Streptococcaceae;D_5_Lactococcus;D_6_uncultured bacterium                   | 2.24   | 3.08   | 5   | 443   | 465   | 565.48   | 609.44   |
| D_0_Bacteria;D_1_Firmicutes;D_2_Bacilli;D_3_Lactobacillales;D_4_Lactobacillaceae;D_5_Pediococcus;D_6_Pediococcus pentosaceus                | 0.08   | 0.36   | 1   | 389   | 480   | 613.12   | 671.36   |
| D_0_Bacteria;D_1_Proteobacteria;D_2_Gammaproteobacteria;D_3_Pseudomonadales;D_4_Pseudomonadaceae;D_5_Pseudomonas;_                          | 73.28  | 112.76 | 203 | 330   | 339   | 395.32   | 419.96   |
| D_0_Bacteria;D_1_Proteobacteria;D_2_Gammaproteobacteria;D_3_Pseudomonadales;D_4_Pseudomonadaceae;D_5_Pseudomonas;D_6_Pseudomonas aeruginosa | 7.52   | 33.84  | 94  | 183   | 186   | 339.6    | 406.8    |
| D_0_Bacteria;D_1_Firmicutes;D_2_Bacilli;D_3_Bacillales;D_4_Bacillaceae;D_5_Bacillus;_                                                       | 72.32  | 80.44  | 99  | 177   | 181   | 638.6    | 838.8    |
| D_0_Bacteria;D_1_Proteobacteria;D_2_Gammaproteobacteria;D_3_Pseudomonadales;D_4_Pseudomonadaceae;D_5_Pseudomonas;D_6_uncultured bacterium   | 1.76   | 7.92   | 22  | 75    | 118   | 182.64   | 210.92   |
| D_0_Bacteria;D_1_Proteobacteria;D_2_Gammaproteobacteria;D_3_Enterobacteriales;D_4_Enterobacteriaceae;D_5_Serratia;_                         | 5.24   | 20.08  | 54  | 71    | 183   | 327      | 390      |
| Unassigned; ; ; ; ; ; ;_                                                                                                                    | 3.6    | 16.2   | 45  | 52    | 71    | 172.12   | 216.36   |
| D_0_Bacteria;D_1_Proteobacteria;D_2_Gammaproteobacteria;D_3_Enterobacteriales;D_4_Enterobacteriaceae;D_5_Pantoea;_                          | 11.08  | 11.36  | 12  | 43    | 70    | 89.2     | 97.6     |
| D_0_Bacteria;D_1_Actinobacteria;D_2_Actinobacteria;D_3_Micrococcales;D_4_Micrococcaceae;D_5_Kocuria;_                                       | 0.56   | 2.52   | 7   | 41    | 71    | 90.84    | 99.52    |
| D_0_Bacteria;D_1_Firmicutes;D_2_Bacilli;D_3_Lactobacillales;D_4_Leuconostocaceae;D_5_Leuconostoc;D_6_Leuconostoc pseudomesenteroides        | 0.24   | 1.08   | 3   | 28    | 33    | 39.4     | 42.2     |

## A. diaperinus

| 70%and100%ofsamples                                                                                                               |         |         |        |      |        |          |          |
|-----------------------------------------------------------------------------------------------------------------------------------|---------|---------|--------|------|--------|----------|----------|
| Feature ID                                                                                                                        | 2%      | 9%      | 25%    | 50%  | 75%    | 91%      | 98%      |
| D_0__Bacteria;D_1__Proteobacteria;D_2__Gammaproteobacteria;D_3__Enterobacteriales;D_4__Enterobacteriaceae;D_5__Enterobacter;__    | 3451.48 | 3547.66 | 3767.5 | 4111 | 50509  | 80203.72 | 93195.16 |
| D_0__Bacteria;D_1__Proteobacteria;D_2__Gammaproteobacteria;D_3__Enterobacteriales;D_4__Enterobacteriaceae;__;_                    | 799.08  | 1089.86 | 1754.5 | 2793 | 2841.5 | 2872.54  | 2886.12  |
| D_0__Bacteria;D_1__Firmicutes;D_2__Bacilli;D_3__Lactobacillales;D_4__Enterococcaceae;D_5__Enterococcus;__                         | 356.6   | 376.2   | 421    | 491  | 1392   | 1968.64  | 2220.92  |
| D_0__Bacteria;D_1__Firmicutes;D_2__Bacilli;D_3__Bacillales;D_4__Staphylococcaceae;D_5__Staphylococcus;_                           | 232.96  | 267.82  | 347.5  | 472  | 903.5  | 1179.66  | 1300.48  |
| D_0__Bacteria;D_1__Firmicutes;D_2__Bacilli;D_3__Lactobacillales;D_4__Streptococcaceae;D_5__Lactococcus;D_6__uncultured bacterium  | 131.92  | 156.14  | 211.5  | 298  | 1386.5 | 2083.14  | 2387.92  |
| D_0__Bacteria;D_1__Firmicutes;D_2__Bacilli;D_3__Lactobacillales;D_4__Streptococcaceae;D_5__Lactococcus;__                         | 157.24  | 165.08  | 183    | 211  | 1049   | 1585.32  | 1819.96  |
| D_0__Bacteria;D_1__Firmicutes;D_2__Bacilli;D_3__Lactobacillales;D_4__Enterococcaceae;D_5__Enterococcus;D_6__Enterococcus faecalis | 15.56   | 17.52   | 22     | 29   | 335.5  | 531.66   | 617.48   |
| D_0__Bacteria;D_1__Firmicutes;D_2__Bacilli;D_3__Bacillales;D_4__Listeriaceae;D_5__Listeria;__                                     | 15.24   | 16.08   | 18     | 21   | 244.5  | 387.54   | 450.12   |
| D_0__Bacteria;D_1__Actinobacteria;D_2__Actinobacteria;D_3__Micrococcales;D_4__Brevibacteriaceae;D_5__Brevibacterium;__            | 13.08   | 13.36   | 14     | 15   | 140.5  | 220.82   | 255.96   |
| D_0__Bacteria;D_1__Actinobacteria;D_2__Actinobacteria;D_3__Corynebacteriales;D_4__Corynebacteriaceae;D_5__Corynebacterium 1;__    | 10.16   | 10.72   | 12     | 14   | 208    | 332.16   | 386.48   |
| D_0__Bacteria;D_1__Actinobacteria;D_2__Actinobacteria;D_3__Micrococcales;D_4__Dermabacteraceae;D_5__Brachybacterium;__            | 6.32    | 7.44    | 10     | 14   | 100.5  | 155.86   | 180.08   |
| D_0__Bacteria;D_1__Firmicutes;D_2__Bacilli;D_3__Bacillales;D_4__Bacillaceae;D_5__Bacillus;_                                       | 4.04    | 4.18    | 4.5    | 5    | 5      | 5        | 5        |
| D_0__Bacteria;D_1__Proteobacteria;D_2__Gammaproteobacteria;D_3__Pseudomonadales;D_4__Moraxellaceae;D_5__Acinetobacter;__          | 2.08    | 2.36    | 3      | 4    | 17.5   | 26.14    | 29.92    |
| D_0__Bacteria;D_1__Firmicutes;D_2__Bacilli;D_3__Bacillales;D_4__Bacillaceae;D_5__Bacillus;D_6__Bacillus pumilus                   | 3       | 3       | 3      | 3    | 4      | 4.64     | 4.92     |



## A. domesticus

| 100%ofsamples                                                                                                                                       |        |        |        |       |         |         |         |
|-----------------------------------------------------------------------------------------------------------------------------------------------------|--------|--------|--------|-------|---------|---------|---------|
| Feature ID                                                                                                                                          | 2%     | 9%     | 25%    | 50%   | 75%     | 91%     | 98%     |
| D_0_Bacteria;D_1_Bacteroidetes;D_2_Bacteroidia;D_3_Bacteroidales;D_4_Tannerellaceae;D_5_Parabacteroides;D_6_uncultured bacterium                    | 327.68 | 407.06 | 588.5  | 725   | 1343.75 | 2451.11 | 2935.58 |
| D_0_Bacteria;D_1_Bacteroidetes;D_2_Bacteroidia;D_3_Bacteroidales;D_4_Bacteroidaceae;D_5_Bacteroides;__                                              | 93.32  | 129.44 | 212    | 294   | 850.25  | 1843.37 | 2277.86 |
| D_0_Bacteria;D_1_Proteobacteria;D_2_Gammaproteobacteria;D_3_Enterobacteriales;D_4_Enterobacteriaceae;__;_                                           | 116.76 | 126.42 | 148.5  | 219   | 349.5   | 486.78  | 546.84  |
| D_0_Bacteria;D_1_Firmicutes;D_2_Clostridia;D_3_Clostridiales;D_4_Lachnospiraceae;__;_                                                               | 89.66  | 102.47 | 131.75 | 149.5 | 184.5   | 246.9   | 274.2   |
| D_0_Bacteria;D_1_Bacteroidetes;D_2_Bacteroidia;D_3_Bacteroidales;D_4_Tannerellaceae;D_5_Parabacteroides;__                                          | 71.12  | 82.04  | 107    | 139   | 369     | 774.12  | 951.36  |
| D_0_Bacteria;D_1_Bacteroidetes;D_2_Bacteroidia;D_3_Bacteroidales;D_4_Rikenellaceae;D_5_Alistipes;__                                                 | 31.1   | 38.45  | 55.25  | 108.5 | 170.5   | 204.1   | 218.8   |
| D_0_Bacteria;D_1_Firmicutes;D_2_Bacilli;D_3_Lactobacillales;D_4_Enterococcaceae;D_5_Enterococcus;__                                                 | 64.2   | 68.4   | 78     | 90.5  | 463     | 1163.8  | 1470.4  |
| D_0_Bacteria;D_1_Bacteroidetes;D_2_Bacteroidia;D_3_Bacteroidales;D_4_Dysgonomonadaceae;D_5_Dysgonomonas;__                                          | 25.12  | 36.04  | 61     | 79    | 96      | 119.04  | 129.12  |
| D_0_Bacteria;D_1_Proteobacteria;D_2_Gammaproteobacteria;D_3_Enterobacteriales;D_4_Enterobacteriaceae;D_5_Enterobacter;__                            | 19.82  | 29.69  | 52.25  | 71.5  | 103.75  | 151.27  | 172.06  |
| D_0_Bacteria;D_1_Firmicutes;D_2_Clostridia;D_3_Clostridiales;D_4_Ruminococcaceae;D_5_uncultured;__                                                  | 55.24  | 56.08  | 58     | 63.5  | 74.75   | 87.71   | 93.38   |
| D_0_Bacteria;D_1_Firmicutes;D_2_Clostridia;D_3_Clostridiales;D_4_Ruminococcaceae;D_5_GCA-900066225;__                                               | 19.38  | 24.21  | 35.25  | 56    | 71.25   | 71.73   | 71.94   |
| D_0_Bacteria;D_1_Proteobacteria;D_2_Gammaproteobacteria;D_3_Enterobacteriales;D_4_Enterobacteriaceae;D_5_Klebsiella;__                              | 11.46  | 20.07  | 39.75  | 51.5  | 58.25   | 68.33   | 72.74   |
| D_0_Bacteria;D_1_Bacteroidetes;D_2_Bacteroidia;D_3_Bacteroidales;D_4_Rikenellaceae;D_5_Alistipes;D_6_uncultured bacterium                           | 23.42  | 24.89  | 28.25  | 50.5  | 72.75   | 76.11   | 77.58   |
| D_0_Bacteria;D_1_Proteobacteria;D_2_Gammaproteobacteria;D_3_Pseudomonadales;D_4_Pseudomonadaceae;D_5_Pseudomonas;__                                 | 43.36  | 44.62  | 47.5   | 49.5  | 75.25   | 123.73  | 144.94  |
| D_0_Bacteria;D_1_Proteobacteria;D_2_Gammaproteobacteria;D_3_Enterobacteriales;D_4_Enterobacteriaceae;D_5_Citrobacter;__                             | 11.98  | 18.91  | 34.75  | 47.5  | 59.5    | 73.9    | 80.2    |
| D_0_Bacteria;D_1_Firmicutes;D_2_Clostridia;D_3_Clostridiales;D_4_Ruminococcaceae;D_5_Candidatus Soleaferrea;__                                      | 25.12  | 25.54  | 26.5   | 35    | 44.5    | 47.38   | 48.64   |
| D_0_Bacteria;D_1_Firmicutes;D_2_Bacilli;D_3_Lactobacillales;D_4_Streptococcaceae;D_5_Lactococcus;D_6_uncultured bacterium                           | 14.6   | 16.7   | 21.5   | 34.5  | 289     | 757.48  | 962.44  |
| D_0_Bacteria;D_1_Proteobacteria;D_2_Deltaproteobacteria;D_3_Desulfovibrionales;D_4_Desulfovibrionaceae;D_5_Desulfovibrio;__                         | 12.3   | 13.35  | 15.75  | 24.5  | 41      | 58.28   | 65.84   |
| D_0_Bacteria;D_1_Firmicutes;D_2_Clostridia;D_3_Clostridiales;D_4_Ruminococcaceae;D_5_Candidatus Soleaferrea;D_6_uncultured bacterium                | 2.36   | 3.62   | 6.5    | 16    | 26      | 29.84   | 31.52   |
| D_0_Bacteria;D_1_Firmicutes;D_2_Clostridia;D_3_Clostridiales;D_4_Lachnospiraceae;D_5_uncultured;D_6_uncultured bacterium                            | 6.24   | 7.08   | 9      | 16    | 31.5    | 49.74   | 57.72   |
| D_0_Bacteria;D_1_Firmicutes;D_2_Clostridia;D_3_Clostridiales;D_4_Family XIII;D_5_Anaerovorax;__                                                     | 5.18   | 5.81   | 7.25   | 14    | 20      | 20      | 20      |
| D_0_Bacteria;D_1_Firmicutes;D_2_Negativicutes;D_3_Selenomonadales;D_4_Acidaminococcaceae;D_5_uncultured;__                                          | 3.6    | 5.7    | 10.5   | 13    | 13.75   | 15.19   | 15.82   |
| D_0_Bacteria;D_1_Verrucomicrobia;D_2_Verrucomicrobiae;D_3_Verrucomicrobiales;D_4_Akkermansia;D_5_Akkermansia;D_6_uncultured bacterium               | 5.3    | 6.35   | 8.75   | 13    | 28      | 51.04   | 61.12   |
| D_0_Bacteria;D_1_Bacteroidetes;D_2_Bacteroidia;D_3_Bacteroidales;D_4_Paludibacteraceae;D_5_Paludibacter;__                                          | 8.06   | 8.27   | 8.75   | 11    | 15.75   | 21.03   | 23.34   |
| D_0_Bacteria;D_1_Firmicutes;D_2_Erysipelotrichia;D_3_Erysipelotrichales;D_4_Erysipelotrichaceae;D_5_Erysipelatoclostridium;D_6_uncultured bacterium | 5.18   | 5.81   | 7.25   | 10.5  | 13      | 13      | 13      |
| D_0_Bacteria;D_1_Firmicutes;D_2_Clostridia;D_3_Clostridiales;D_4_Lachnospiraceae;D_5_Lachnoclostridium;__                                           | 5      | 5      | 5      | 8.5   | 13.25   | 15.65   | 16.7    |
| D_0_Bacteria;D_1_Proteobacteria;D_2_Alphaproteobacteria;D_3_Rhodospirillales;D_4_Magnetospirillaceae;__;_                                           | 2.3    | 3.35   | 5.75   | 7.5   | 8       | 8       | 8       |
| D_0_Bacteria;D_1_Firmicutes;D_2_Clostridia;D_3_Clostridiales;D_4_Lachnospiraceae;D_5_GCA-900066575;D_6_uncultured bacterium                         | 4.06   | 4.27   | 4.75   | 5     | 7.25    | 11.57   | 13.46   |
| D_0_Bacteria;D_1_Firmicutes;D_2_Erysipelotrichia;D_3_Erysipelotrichales;D_4_Erysipelotrichaceae;D_5_Erysipelatoclostridium;__                       | 1.12   | 1.54   | 2.5    | 3     | 7.25    | 15.41   | 18.98   |
|                                                                                                                                                     |        |        |        |       |         |         |         |
|                                                                                                                                                     |        |        |        |       |         |         |         |
| 70%ofsamples                                                                                                                                        |        |        |        |       |         |         |         |
| Feature ID                                                                                                                                          | 2%     | 9%     | 25%    | 50%   | 75%     | 91%     | 98%     |
| D_0_Bacteria;D_1_Bacteroidetes;D_2_Bacteroidia;D_3_Bacteroidales;D_4_Tannerellaceae;D_5_Parabacteroides;D_6_uncultured bacterium                    | 327.68 | 407.06 | 588.5  | 725   | 1343.75 | 2451.11 | 2935.58 |
| D_0_Bacteria;D_1_Firmicutes;D_2_Bacilli;D_3_Bacillales;D_4_Bacillaceae;D_5_Bacillus;__                                                              | 1.14   | 5.13   | 14.25  | 355   | 1693.75 | 3619.03 | 4461.34 |
| D_0_Bacteria;D_1_Bacteroidetes;D_2_Bacteroidia;D_3_Bacteroidales;D_4_Bacteroidaceae;D_5_Bacteroides;__                                              | 93.32  | 129.44 | 212    | 294   | 850.25  | 1843.37 | 2277.86 |
| D_0_Bacteria;D_1_Proteobacteria;D_2_Gammaproteobacteria;D_3_Enterobacteriales;D_4_Enterobacteriaceae;__;_                                           | 116.76 | 126.42 | 148.5  | 219   | 349.5   | 486.78  | 546.84  |
| D_0_Bacteria;D_1_Firmicutes;D_2_Clostridia;D_3_Clostridiales;D_4_Lachnospiraceae;__;_                                                               | 89.66  | 102.47 | 131.75 | 149.5 | 184.5   | 246.9   | 274.2   |
| D_0_Bacteria;D_1_Bacteroidetes;D_2_Bacteroidia;D_3_Bacteroidales;D_4_Tannerellaceae;D_5_Parabacteroides;__                                          | 71.12  | 82.04  | 107    | 139   | 369     | 774.12  | 951.36  |
| D_0_Bacteria;D_1_Bacteroidetes;D_2_Bacteroidia;D_3_Bacteroidales;D_4_Rikenellaceae;D_5_Alistipes;__                                                 | 31.1   | 38.45  | 55.25  | 108.5 | 170.5   | 204.1   | 218.8   |
| D_0_Bacteria;D_1_Firmicutes;D_2_Bacilli;D_3_Lactobacillales;D_4_Enterococcaceae;D_5_Enterococcus;__                                                 | 64.2   | 68.4   | 78     | 90.5  | 463     | 1163.8  | 1470.4  |
| D_0_Bacteria;D_1_Bacteroidetes;D_2_Bacteroidia;D_3_Bacteroidales;D_4_Dysgonomonadaceae;D_5_Dysgonomonas;__                                          | 25.12  | 36.04  | 61     | 79    | 96      | 119.04  | 129.12  |
| D_0_Bacteria;D_1_Proteobacteria;D_2_Gammaproteobacteria;D_3_Enterobacteriales;D_4_Enterobacteriaceae;D_5_Enterobacter;__                            | 19.82  | 29.69  | 52.25  | 71.5  | 103.75  | 151.27  | 172.06  |
| D_0_Bacteria;D_1_Firmicutes;D_2_Clostridia;D_3_Clostridiales;D_4_Ruminococcaceae;D_5_uncultured;__                                                  | 55.24  | 56.08  | 58     | 63.5  | 74.75   | 87.71   | 93.38   |
| D_0_Bacteria;D_1_Firmicutes;D_2_Clostridia;D_3_Clostridiales;D_4_Ruminococcaceae;D_5_GCA-900066225;__                                               | 19.38  | 24.21  | 35.25  | 56    | 71.25   | 71.73   | 71.94   |
| D_0_Bacteria;D_1_Proteobacteria;D_2_Gammaproteobacteria;D_3_Enterobacteriales;D_4_Enterobacteriaceae;D_5_Klebsiella;__                              | 11.46  | 20.07  | 39.75  | 51.5  | 58.25   | 68.33   | 72.74   |
| D_0_Bacteria;D_1_Bacteroidetes;D_2_Bacteroidia;D_3_Bacteroidales;D_4_Rikenellaceae;D_5_Alistipes;D_6_uncultured bacterium                           | 23.42  | 24.89  | 28.25  | 50.5  | 72.75   | 76.11   | 77.58   |
| D_0_Bacteria;D_1_Proteobacteria;D_2_Gammaproteobacteria;D_3_Pseudomonadales;D_4_Pseudomonadaceae;D_5_Pseudomonas;__                                 | 43.36  | 44.62  | 47.5   | 49.5  | 75.25   | 123.73  | 144.94  |
| D_0_Bacteria;D_1_Proteobacteria;D_2_Gammaproteobacteria;D_3_Enterobacteriales;D_4_Enterobacteriaceae;D_5_Citrobacter;__                             | 11.98  | 18.91  | 34.75  | 47.5  | 59.5    | 73.9    | 80.2    |
| D_0_Bacteria;D_1_Firmicutes;D_2_Clostridia;D_3_Clostridiales;D_4_Ruminococcaceae;D_5_Candidatus Soleaferrea;__                                      | 25.12  | 25.54  | 26.5   | 35    | 44.5    | 47.38   | 48.64   |

|                                                                                                                                                     |      |       |       |      |       |        |        |
|-----------------------------------------------------------------------------------------------------------------------------------------------------|------|-------|-------|------|-------|--------|--------|
| D_0_Bacteria;D_1_Firmicutes;D_2_Bacilli;D_3_Lactobacillales;D_4_Streptococcaceae;D_5_Lactococcus;D_6_uncultured bacterium                           | 14.6 | 16.7  | 21.5  | 34.5 | 289   | 757.48 | 962.44 |
| D_0_Bacteria;D_1_Proteobacteria;D_2_Deltaproteobacteria;D_3_Desulfovibrionales;D_4_Desulfovibrionaceae;D_5_Desulfovibrio;__                         | 12.3 | 13.35 | 15.75 | 24.5 | 41    | 58.28  | 65.84  |
| D_0_Bacteria;D_1_Firmicutes;D_2_Clostridia;D_3_Clostridiales;D_4_Lachnospiraceae;D_5_Tyzzera 3;__                                                   | 0.84 | 3.78  | 10.5  | 20   | 26.75 | 28.19  | 28.82  |
| D_0_Bacteria;D_1_Firmicutes;D_2_Clostridia;D_3_Clostridiales;D_4_Ruminococcaceae;D_5_Candidatus Soleaferrea;D_6_uncultured bacterium                | 2.36 | 3.62  | 6.5   | 16   | 26    | 29.84  | 31.52  |
| D_0_Bacteria;D_1_Firmicutes;D_2_Clostridia;D_3_Clostridiales;D_4_Lachnospiraceae;D_5_uncultured;D_6_uncultured bacterium                            | 6.24 | 7.08  | 9     | 16   | 31.5  | 49.74  | 57.72  |
| D_0_Bacteria;D_1_Firmicutes;D_2_Clostridia;D_3_Clostridiales;D_4_Family XIII;D_5_Anaerovorax;__                                                     | 5.18 | 5.81  | 7.25  | 14   | 20    | 20     | 20     |
| D_0_Bacteria;D_1_Verrucomicrobia;D_2_Verrucomicrobiae;D_3_Verrucomicrobiales;D_4_Akkermansia;D_5_Akkermansia;D_6_uncultured bacterium               | 5.3  | 6.35  | 8.75  | 13   | 28    | 51.04  | 61.12  |
| D_0_Bacteria;D_1_Firmicutes;D_2_Negativicutes;D_3_Selenomonadales;D_4_Acidaminococcaceae;D_5_uncultured;__                                          | 3.6  | 5.7   | 10.5  | 13   | 13.75 | 15.19  | 15.82  |
| D_0_Bacteria;D_1_Bacteroidetes;D_2_Bacteroidia;D_3_Flavobacteriales;D_4_Weeksellaceae;D_5_Apibacter;__                                              | 0.54 | 2.43  | 6.75  | 12   | 20    | 29.6   | 33.8   |
| D_0_Bacteria;D_1_Bacteroidetes;D_2_Bacteroidia;D_3_Bacteroidales;D_4_Paludibacteraceae;D_5_Paludibacter;__                                          | 8.06 | 8.27  | 8.75  | 11   | 15.75 | 21.03  | 23.34  |
| D_0_Bacteria;D_1_Firmicutes;D_2_Erysipelotrichia;D_3_Erysipelotrichales;D_4_Erysipelotrichaceae;D_5_Erysipelatoclostridium;D_6_uncultured bacterium | 5.18 | 5.81  | 7.25  | 10.5 | 13    | 13     | 13     |
| D_0_Bacteria;D_1_Firmicutes;D_2_Clostridia;D_3_Clostridiales;D_4_Lachnospiraceae;D_5_Lachnoclostridium;__                                           | 5    | 5     | 5     | 8.5  | 13.25 | 15.65  | 16.7   |
| D_0_Bacteria;D_1_Firmicutes;D_2_Clostridia;D_3_Clostridiales;D_4_Ruminococcaceae;D_5_Butyricoccus;__                                                | 0.48 | 2.16  | 6     | 8    | 14.5  | 26.98  | 32.44  |
| D_0_Bacteria;D_1_Firmicutes;D_2_Clostridia;D_3_Clostridiales;D_4_Lachnospiraceae;D_5_Blautia;__                                                     | 0.36 | 1.62  | 4.5   | 8    | 13.25 | 19.49  | 22.22  |
| D_0_Bacteria;D_1_Bacteroidetes;D_2_Bacteroidia;D_3_Bacteroidales;D_4_Dysgonomadaeaceae;D_5_uncultured;__                                            | 0.3  | 1.35  | 3.75  | 7.5  | 11.25 | 13.65  | 14.7   |
| D_0_Bacteria;D_1_Proteobacteria;D_2_Alphaproteobacteria;D_3_Rhodospirillales;D_4_Magnetospirillaceae;__                                             | 2.3  | 3.35  | 5.75  | 7.5  | 8     | 8      | 8      |
| D_0_Bacteria;D_1_Proteobacteria;D_2_Gammaproteobacteria;D_3_Enterobacteriales;D_4_Enterobacteriaceae;D_5_Dickeya;__                                 | 0.18 | 0.81  | 2.25  | 6    | 86.75 | 236.03 | 301.34 |
| D_0_Bacteria;D_1_Proteobacteria;D_2_Gammaproteobacteria;D_3_Betaproteobacteriales;D_4_Neisseriaceae;__                                              | 0.06 | 0.27  | 0.75  | 5.5  | 10.5  | 11.46  | 11.88  |
| D_0_Bacteria;D_1_Firmicutes;D_2_Clostridia;D_3_Clostridiales;D_4_Lachnospiraceae;D_5_GCA-900066575;D_6_uncultured bacterium                         | 4.06 | 4.27  | 4.75  | 5    | 7.25  | 11.57  | 13.46  |
| D_0_Bacteria;D_1_Firmicutes;D_2_Clostridia;D_3_Clostridiales;D_4_Lachnospiraceae;D_5_Tyzzera;__                                                     | 0.12 | 0.54  | 1.5   | 5    | 8.5   | 9.46   | 9.88   |
| D_0_Bacteria;D_1_Fusobacteria;D_2_Fusobacteriia;D_3_Fusobacteriales;D_4_Fusobacteriaceae;D_5_Fusobacterium;__                                       | 0.12 | 0.54  | 1.5   | 4    | 9.75  | 16.95  | 20.1   |
| D_0_Bacteria;D_1_Proteobacteria;D_2_Deltaproteobacteria;D_3_Desulfovibrionales;D_4_Desulfovibrionaceae;D_5_uncultured;D_6_uncultured bacterium      | 0.18 | 0.81  | 2.25  | 4    | 8.75  | 15.95  | 19.1   |
| D_0_Bacteria;D_1_Firmicutes;D_2_Bacilli;D_3_Lactobacillales;D_4_Leuconostocaceae;D_5_Weissella;D_6_Weissella confusa                                | 0.12 | 0.54  | 1.5   | 3.5  | 50.25 | 137.13 | 175.14 |
| D_0_Bacteria;D_1_Firmicutes;D_2_Erysipelotrichia;D_3_Erysipelotrichales;D_4_Erysipelotrichaceae;D_5_Erysipelatoclostridium;__                       | 1.12 | 1.54  | 2.5   | 3    | 7.25  | 15.41  | 18.98  |
| D_0_Bacteria;D_1_Firmicutes;D_2_Clostridia;D_3_Clostridiales;D_4_Lachnospiraceae;D_5_Blautia;D_6_uncultured bacterium                               | 0.18 | 0.81  | 2.25  | 3    | 5.75  | 11.03  | 13.34  |
| D_0_Bacteria;D_1_Firmicutes;D_2_Clostridia;D_3_Clostridiales;D_4_Christensenellaceae;D_5_Christensenellaceae R-7 group;D_6_uncultured bacterium     | 0.12 | 0.54  | 1.5   | 2.5  | 4.75  | 8.11   | 9.58   |
| D_0_Bacteria;D_1_Firmicutes;D_2_Clostridia;D_3_Clostridiales;D_4_Clostridiales vadinBB60 group;D_5_uncultured bacterium;D_6_uncultured bacterium    | 0.06 | 0.27  | 0.75  | 2    | 33.75 | 92.79  | 118.62 |

### Venn results

| Names                                 | total | genera                        |
|---------------------------------------|-------|-------------------------------|
| Acheta ∩<br>Alphitobius ∩<br>Tenebrio | 4     | Enterobacteriaceae_genus      |
|                                       |       | Lactococcus                   |
|                                       |       | Enterobacter                  |
|                                       |       | Enterococcus                  |
| Alphitobius ∩<br>Tenebrio             | 2     | Staphylococcus                |
|                                       |       | Bacillus                      |
| Acheta ∩ Tenebrio                     | 1     | Pseudomonas                   |
| Tenebrio                              | 3     | Spiroplasma                   |
|                                       |       | Pantoea                       |
|                                       |       | Serratia                      |
| Alphitobius                           | 5     | Brevibacterium                |
|                                       |       | Acinetobacter                 |
|                                       |       | Brachybacterium               |
|                                       |       | Listeria                      |
|                                       |       | Corynebacterium 1             |
| Acheta                                | 20    | Paludibacter                  |
|                                       |       | Candidatus_Soleaferrea        |
|                                       |       | Magnetospirillaceae_genus     |
|                                       |       | Bacteroides                   |
|                                       |       | Parabacteroides               |
|                                       |       | Dysgonomonas                  |
|                                       |       | Akkermansia                   |
|                                       |       | Alistipes                     |
|                                       |       | Acidaminococcaceae_uncultured |
|                                       |       | Erysipelatoclostridium        |
|                                       |       | Lachnoclostridium             |
|                                       |       | Klebsiella                    |
|                                       |       | Lachnospiraceae_GCA-900066575 |
|                                       |       | Ruminococcaceae_uncultured    |
|                                       |       | Ruminococcaceae_GCA-900066225 |
|                                       |       | Lachnospiraceae_uncultured    |
|                                       |       | Citrobacter                   |
| Lachnospiraceae_genus                 |       |                               |
| Desulfovibrio                         |       |                               |
| Anaerovorax                           |       |                               |
